# Supplementary material for: SPTAN1 Expression Predicts Treatment and Survival Outcomes in Colorectal Cancer
Source: MDPI journal article supplement (doi:10.3390/cancers13143638), 2021-07-20
Supplement: s1 [file s1]

# Supplementary Materials: SPTAN1 Expression Predicts Treatment and Survival Outcomes in Colorectal Cancer

Christopher Schrecker, Sophia Behrens, Rebecca Schönherr, Anne Ackermann, Daniel Pauli, Guido Plotz, Stefan Zeuzem and Angela Brieger

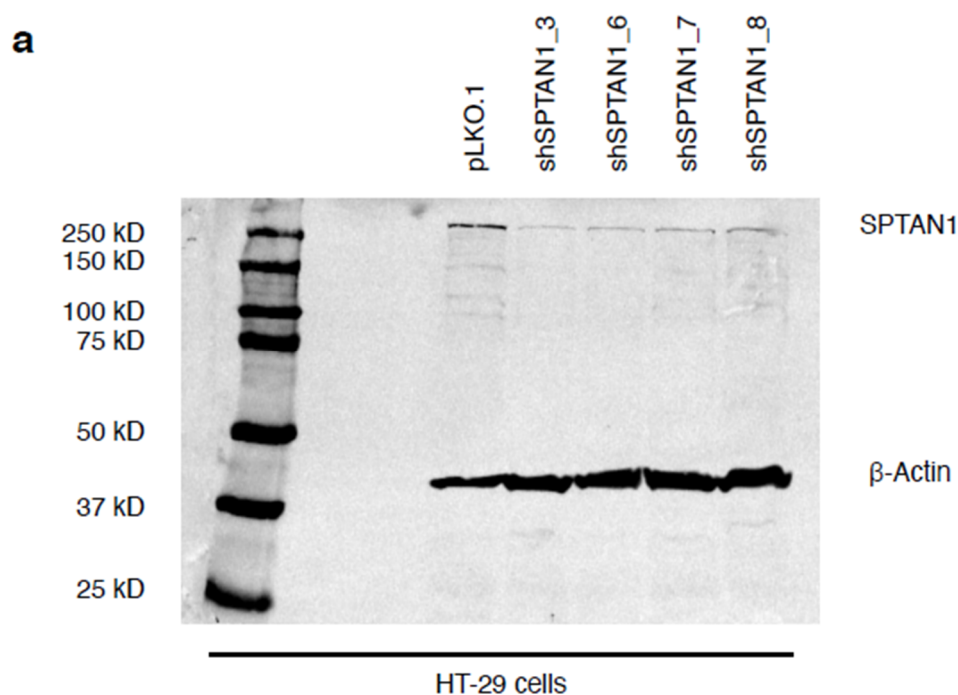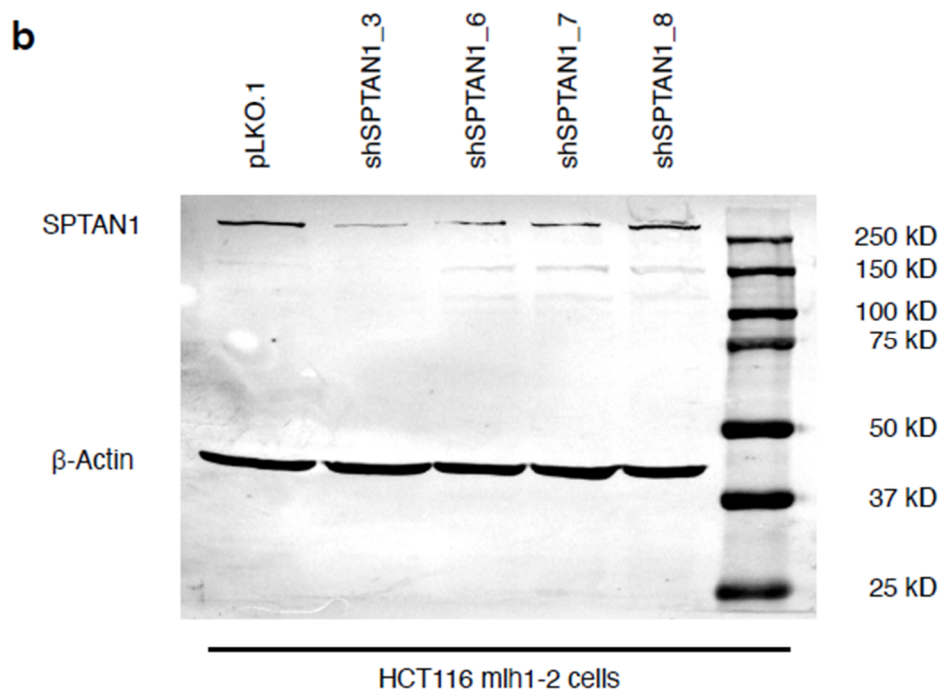

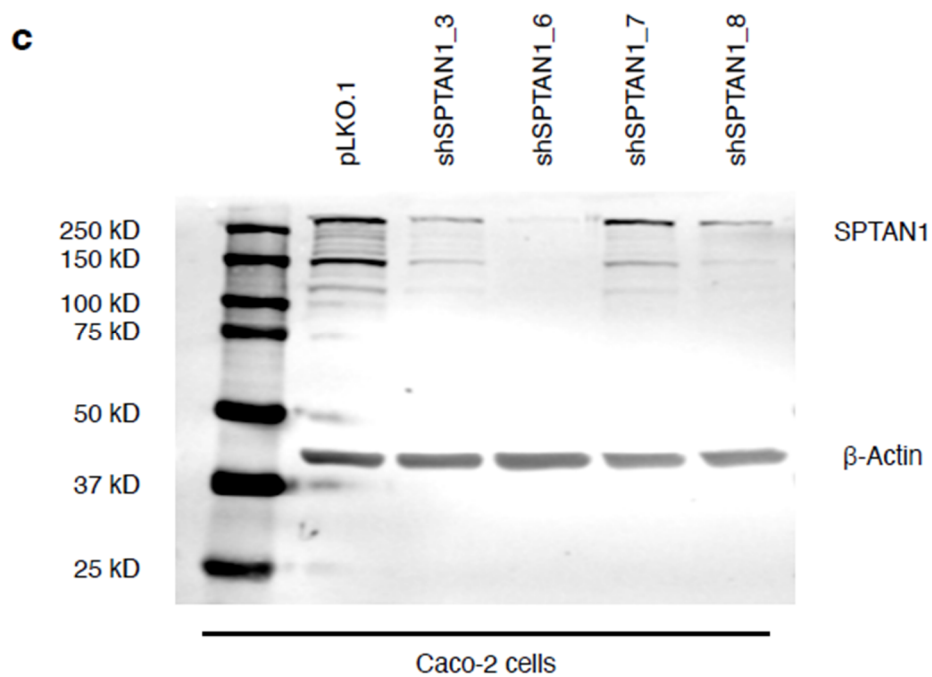

**Figure S1.** The uncropped Western blots.
